# Supplementary material for: A new polymeric chain formed by paradodecatungstate clusters and [Cu(en)2]2+complexes: hydrothermal synthesis and characterization of [Cu(en)2]3[{Cu(en)2}2(H2W12O42)]·12H2O
Source: Royal Society of Chemistry journal article supplement (doi:10.1039/b301917a), 2003-01-01
Supplement: b301917a.doc [file b301917a.doc]

***Supplemental Material***

**Thermal variations of the magnetic susceptibility of 1**

The temperature dependencies of the magnetic susceptibilities and inverse susceptibilities of compound **1** are shown in Fig. S1. The effective magnetic moment (**eff) per copper at 290 K (1.86 **B), determined from the equation **eff = 2.828(**m*T*)½, is slightly greater than that expected for an isolated system with *S* = 1/2 and *g* = 2 (**eff = 1.73 **B). The **m1 *vs*. *T* plot is almost linear in the temperature range of 4  290 K, indicating principally paramagnetism in **1**. The magnetic susceptibility data were therefore analyzed with the Curie-Weiss law, based on eqn. (2) where *N*, *g*, **B and *k*

**m= *Ng*2**B2*S*(*S*+1)/3*k*(*T***). (2)

have their usual meanings and ** is the Weiss constant. A least-squares fit obtains the parameters, *g* = 2.12(5), ** = 0.04(2) K and the agreement factor *F* = [**(**obs**cal)2/**obs2]1/2 = 0.067%. The very small ** demonstrates that there do not distinctly exist magnetic interactions between copper ions. The paramagnetic behavior of **1** is consistent with its structure, where the copper centers are well separated with Cu…Cu distances longer than 7.61 Å. The exchange couplings thus can have to be excluded.

**Fig. S1** Thermal variations of the magnetic susceptibility (**m) per copper and inverse susceptibility data (**m1) of compound **1**, where open circles for observed results and solid lines for fitting calculations based on the Curie-Weiss law.
